# Supplementary material for: Destructive Interference-Enabled Metasurface for Efficient Wireless Power Transfer in Implantable Medical Devices
Source: Research Square preprint supplement (doi:10.21203/rs.3.rs-7989589/v1), 2025-11-14
Supplement: Supplementary file 1 [file 2460ca48bd85ddedad6ae680.docx]

**Supporting Information**

**Destructive Interference-Enabled Metasurface for Efficient Wireless Power Transfer in Implantable Medical Devices**

# Yibo Pan1,3, Dun Lu1, Tongxing Huang1, Xinhua Yu2, Ladislau Matekovits3,4, Yang Yan1,Min Hu1, Yubin Gong1 and Wenjie Fu1,*

1 Terahertz Radiation and Application Key Laboratory of Sichuan Province, School of Electronic Science and Engineering, University of Electronic Science and Technology of China, Chengdu 610054, China

2 Guangxi Key Laboratory of Wireless Wideband Communication and Signal Processing, Guilin, University of Electronic Technology, Guilin, 541004, China

3 Department of Electronics and Telecommunications, Politecnico di Torino, Turin 10129, Italy

4 Politehnica University Timisoara, Timisoara 300223, Romania, and Instituto di Elettronica e di Ingegneria dell’Informazione e delle Telecomunicazioni, National Research Council of Italy, Turin 10129, Italy

*[fuwenjie@uestc.edu.cn](mailto:fuwenjie@uestc.edu.cn)


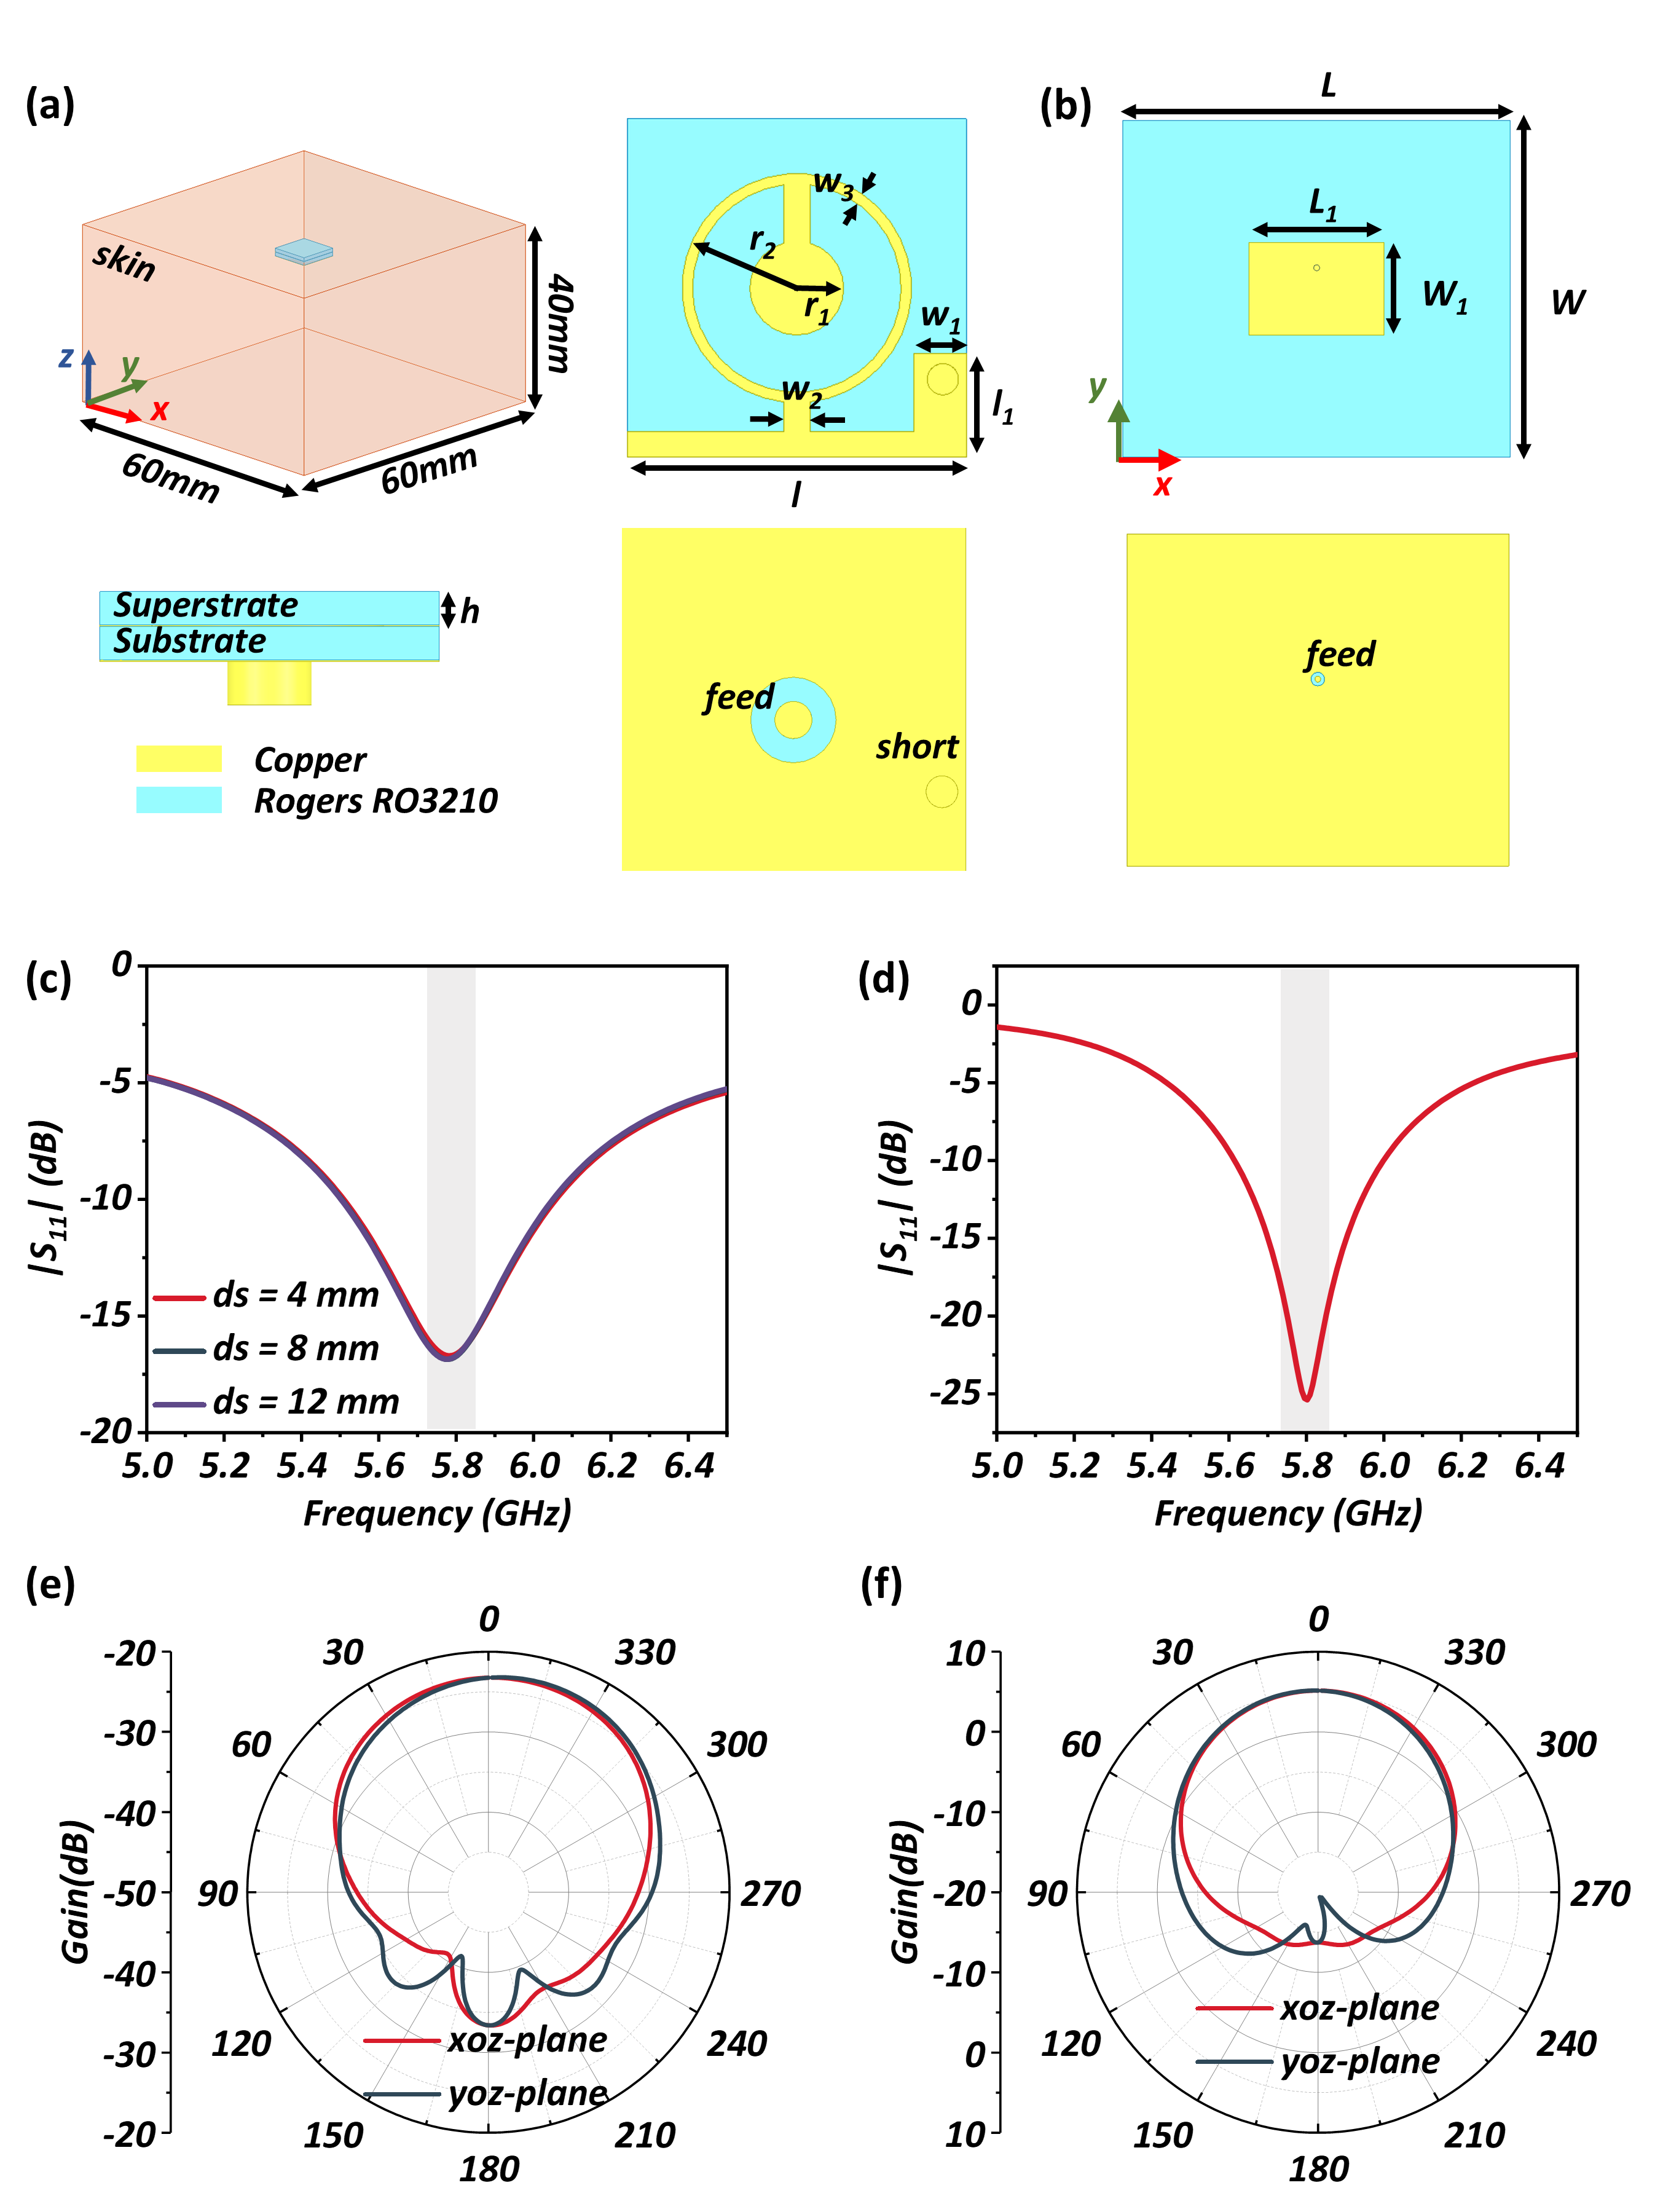


**Fig. S1**. (a) Simulation environment and geometric structure of the proposed implantable antenna. *l* = 6.5 mm, *l*1 = 2 mm, *r*1 = 0.9 mm, *r*2 = 2.2 mm, *w*1 = 1 mm, *w*2 = 0.5 mm, *w*3 = 0.2 mm. (b) Geometric structure of the proposed patch antenna. (c) Simulated reflection coefficient as a function of antenna implantation depth ds. (d) Simulated reflection coefficient of the patch antenna. (e) and (f) represents the radiation patten of the implantable antenna and patch antenna, respectively.

To validate the performance enhancement of the proposed metasurface, a WPT link was constructed, comprising an implantable antenna and a patch antenna. The implantable antenna is designed with a focus on miniaturization and biocompatibility. The radiating patch of the implantable antenna is fabricated on a Rogers 3210 substrate (*ε*r = 10.2, tan *δ* = 0.0025) with a thickness of 0.635 mm, ensuring compact dimensions. A superstrate layer of the same material is employed to isolate the radiating patch from surrounding biological tissues, creating a protective buffer zone between the radiating element and the human body[1,2]. Fig. S1(a) illustrates the simulation setup for the implantable antenna, presenting its structure from top, side, and bottom views. The radiation patch comprises a circular radiating structure with an embedded C-shaped slot and an outer branch structure. A shorting pin with a radius of 0.3 mm is used to connect the radiating patch to the ground plane, further reducing the size of the antenna. And a 50 Ω coaxial feed with a inner radius of 0.35mm is utilized to excite the antenna.

To evaluate the feasibility and safety of the implantable antenna for WPT, simulations are conducted to assess antenna performance within biological tissues and analyze its compliance with safety standards. A single-layer skin phantom model with dimensions of 60 mm × 60 mm × 40 mm is established in CST Microwave Studio to simulate the performance of the antenna. The electrical properties of the phantom model are defined to match those of human skin at 5.8 GHz. Fig. S1(c) depicts the simulation results for evaluating antenna performance at various implantation depths (ds). Simulations reveal that the antenna achieves an impedance bandwidth from 5.6 GHz to 6.2 GHz, encompassing the entire ISM band. The reflection coefficient |*S*11| at resonance remains stable across implantation depths, with minimal variation in resonant frequency. Consequently, an implantation depth of 4 mm is chosen for subsequent simulations and experiments. Fig. S1(e) illustrates the radiation pattern of the antenna at 5.8 GHz, showing a peak gain of -22.1 dB with good directivity, suitable for WPT with external terminals.

Beyond performance optimization, ensuring patient safety is critical for the practical application of implantable antennas. A SAR analysis is therefore conducted to evaluate compliance with international safety standards. Using an input power of 1 W at 5.8 GHz, the simulated 1 g and 10 g SAR values are 354.9 W/kg and 40.2 W/kg, respectively. According to IEEE standards[3,4], the maximum permissible input power for 1 g SAR is 4.5 mW, and for 10 g SAR it is 49.8 mW. Comparatively, the European Research Council (ERC) standard imposes a stricter limit of 25 μW for the input power. These results demonstrate that the designed antenna achieves reliable performance and adheres to international safety standards, ensuring its suitability for practical biomedical applications.

To ensure efficient energy transfer in the proposed WPT system, a rectangular patch antenna is designed and optimized as the transmitter, as depicted in Fig. S1(b). The antenna is fabricated on an FR4 substrate (*ε*r = 4.3, tan *δ* = 0.025) with a thickness of 2 mm. The substrate dimensions are L = 46 mm and W = 40 mm, while the metallic patch dimensions are *L*1 = 16 mm and *W*1 = 11 mm. These dimensions are optimized to ensure resonance within the ISM band while achieving directional radiation suitable for energy transfer. A coaxial feed probe is positioned 3 mm off-center along the *y*-axis, with an inner radius of 0.35 mm.

The reflection coefficient |*S*11| of the Tx antenna, shown in Figure S1(d), demonstrates resonance at 5.8 GHz within the ISM band, with a value of -25.3 dB, indicating excellent impedance matching, which is critical for minimizing reflection losses. The three-dimensional radiation pattern at the resonant frequency, depicted in Figure S1(f), reveals a gain of 5.2 dB and a highly directional radiation pattern. This directional radiation ensures focused energy transmission, making it well-suited for biomedical applications requiring focused power delivery to implantable devices.

TABLE S1

Comparison of the proposed metasurface with recently transmission efficiency enhancement works on body

| Ref. | Frequency  (GHz) | Enhance Method | Footprint  (mm2) | Profile | Flexibility | Metalic Layer | Number of elements | Δ|*S*12|  (dB) |
| --- | --- | --- | --- | --- | --- | --- | --- | --- |
| 5 | 0.915 | Gel matching layer | — | λ/6.1 | Yes | 0 | — | 6.2 |
| 6 | 1.4 | Spherical wave to plane wave | 10712  (103.5 × 103.5) | λ/14.3 | Yes | 2 | 3 × 3 | 12.4 |
| 7 | 2.45 | Evanescent wave to propagating wave | 31416  (π×100×100) | — | Yes | 1 | 1 | 8 |
| 8 | Transform wave impedance | 14400  (120*120) | λ/24.5 | No | 3 | 20 × 20 | 12.1 |
| 9 | Impedance matching | 1600  (40 × 40) | λ/17.5 | No | — | 5 × 5 | 5.61 |
| 10 | **5.8** | EM power focusing | 2401  (49*49) | λ/11 | No | 4 | 7 × 7 | 6.3 |
| **This work** | **Destructive interference** | **784**  **(28*28)** | **λ/26** | **Yes** | **2** | **4** × **4** | **6.1** |

Table S1 summarizes the performance of various transmission enhancement techniques across different frequency bands. The studies in References [5–7] have not addressed the impedance mismatch issue at the air-human body interface, and the studies in References [8–10] only considered non-flexible substrate. Notably, due to the increased absorption loss and reduced penetration depth of biological tissues at higher frequencies (e.g., 5.8 GHz)[11], the achievable transmission enhancement is inherently lower than that at lower frequencies. Nevertheless, the proposed 5.8 GHz WPT system, based on the theory of destructive interference, still demonstrates significant advantages. Compared with the design in Reference [10] operating at the same frequency band, the proposed approach achieves comparable transmission enhancement while significantly reduces structural complexity while maintaining flexibility with an ultra-thin profile of *λ*/26, effectively balancing the key requirements of miniaturization, ease of fabrication, and high performance for implantable WPT systems.

# References

1. Faisal, F. & Yoo, H. A Miniaturized Novel-Shape Dual-Band Antenna for Implantable Applications. *IEEE Trans. Antennas Propagat.* **67**, 774–783 (2019).

2. Faisal, F. *et al.* A Miniaturized Dual-Band Implantable Antenna System for Medical Applications. *IEEE Trans. Antennas Propagat.* **68**, 1161–1165 (2020).

3. Sharma, D. *et al.* Design and implementation of compact dual-band conformal antenna for leadless cardiac pacemaker system. *Sci Rep* **12**, 3165 (2022).

4. Xiong, H. *et al.* High-Efficiency Microwave Wireless Power Transmission via Reflective Phase Gradient Metasurfaces and Surface Wave Aggregation. *ACS Appl. Mater. Interfaces* **16**, 60189–60196 (2024).

5. Bakogianni, S. & Koulouridis, S. A Dual-Band Implantable Rectenna for Wireless Data and Power Support at Sub-GHz Region. *IEEE Trans. Antennas Propagat.* **67**, 6800–6810 (2019).

6. Ren, G., Wang, M., Zheng, H. & Li, E. Wireless Power Transmission Efficiency Improved by Conformal Phase Gradient Metasurface for Implanted Devices. *IEEE J. Electromagn. RF Microw. Med. Biol.* **8**, 325–331 (2024).

7. Yang, F., Lee, P. M., Dong, Z., Tian, X. & Ho, J. S. Enhancing Wireless Transmission from the Body with Wearable Diffractive Patterns. *Phys. Rev. Applied* **12**, 054020 (2019).

8. Yang, F., Nguyen, D. T., Raeker, B. O., Grbic, A. & Ho, J. S. Near-Reflectionless Wireless Transmission Into the Body With Cascaded Metasurfaces. *IEEE Trans. Antennas Propagat.* **70**, 8379–8388 (2022).

9. Xu, L.-J., Zhu, L. & Liang, M. Impedance Matching at Skin–Air Interface for Transmission-Range Improvement of Implantable Antennas. *IEEE Trans. Antennas Propagat.* **71**, 2235–2246 (2023).

10. Jo, S., Lee, W. & Lee, H. Metasurface Patch for Wireless Power Transfer in Implantable Devices. *Adv Funct Materials* **33**, 2300027 (2023).

11. Krimi, I., Ben Mbarek, S., Amara, S., Choubani, F. & Massoud, Y. Mathematical Channel Modeling of Electromagnetic Waves in Biological Tissues for Wireless Body Communication. *Electronics* **12**, 1282 (2023).
